# Supplementary material for: Does maximization of net carbon profit enable the prediction of vegetation behaviour in savanna sites along a precipitation gradient?
Source: Copernicus journal article supplement (doi:10.5194/hess-26-525-2022), 2022-02-01
Supplement: Supplementary file 4 [file hess-26-525-2022-supplement.zip]

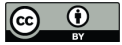

## *Supplement of*

# **Does maximization of net carbon profit enable the prediction of vegetation behaviour in savanna sites along a precipitation gradient?**

**Remko C. Nijzink et al.**

*Correspondence to:* Remko C. Nijzink ([remko.nijzink@list.lu](mailto:remko.nijzink@list.lu))

- [hess-26-525-2022-supplement-title-page.pdf](#)
- [S1\\_weatherdata.pdf](#)
- [S2\\_states\\_fluxes.pdf](#)
- [S3\\_crv\\_sens.pdf](#)
- [S4\\_prescribed\\_cover.pdf](#)
- [S5\\_prescribed\\_roots.pdf](#)
- [S6\\_prescribed\\_cover\\_roots.pdf](#)
- [S7\\_model\\_comparison.pdf](#)
- [S8\\_modeldetails.pdf](#)

The copyright of individual parts of the supplement might differ from the article licence.
