# Supplementary material for: Does maximization of net carbon profit enable the prediction of vegetation behaviour in savanna sites along a precipitation gradient?
Source: Copernicus journal article supplement (doi:10.5194/hess-26-525-2022), 2022-02-01
Supplement: Supplementary file 6 [file hess-26-525-2022-supplement.zip]

# Supplement S8

October 15, 2021

## **1 Model Details**

**Table S8.1.** Time periods for the different models per site that overlap with the flux tower observations, and that are used for model evaluation.

|           | Howard Springs      | Adelaide River      | Daly Uncleared       | Dry River            | Sturt Plains         |
|-----------|---------------------|---------------------|----------------------|----------------------|----------------------|
| BESS      | 7-8-2001–27-12-2012 | 1-1-2007–24-5-2009  | 19-2-2007–27-12-2012 | 31-8-2008–27-12-2012 | 28-8-2008–27-12-2012 |
| BIOS2     | 7-8-2001–31-12-2013 | 1-1-2007–24-5-2009  | 19-2-2007–31-12-2013 | 31-8-2008–31-12-2013 | 28-8-2008–31-12-2013 |
| LPJ-GUESS | 7-8-2001–26-6-2013  | 1-1-2007–23-5-2009  | 19-2-2007–21-7-2013  | 31-8-2008–10-6-2013  | 28-8-2008–11-6-2013  |
| MAESPA    | 7-8-2001–27-6-2013  | 1-1-2007–24-5-2009  | 19-2-2007–22-7-2013  | 31-8-2008–11-6-2013  | 28-8-2008–12-6-2013  |
| SPA       | 7-8-2001–25-6-2013  | 1-1-2007–23-5-2009  | 1-1-2008–31-12-2013  | 31-8-2008–31-12-2012 | 28-8-2008–31-12-2012 |
| CABLE     | 7-8-2001–29-12-2012 | 1-1-2007–31-12-2008 | 19-2-2007–30-12-2012 | 31-8-2008–30-12-2012 | 28-8-2008–30-12-2012 |
| VOM       | 7-8-2001–21-12-2016 | 1-1-2007–24-5-2009  | 19-2-2007–21-12-2016 | 31-8-2008–21-12-2016 | 28-8-2008–21-12-2016 |

**Table S8.2.** Vegetation properties in the Vegetation Optimality Model optimized for maximizing the Net Carbon Profit.

| Parameter            | Description                                            | Initial range    | Timescale | Unit                                |
|----------------------|--------------------------------------------------------|------------------|-----------|-------------------------------------|
| $c_{\lambda f,p}$    | water use parameter perennial vegetation               | 0.0 - 10000.0    | Long-term | $\text{mol mol}^{-1} \text{m}^{-1}$ |
| $c_{\lambda e,p}$    | water use parameter perennial vegetation               | -3.0 - 0.0       | Long-term | -                                   |
| $c_{\lambda f,s}$    | water use parameter seasonal vegetation                | 0.0 - 10000.0    | Long-term | $\text{mol mol}^{-1} \text{m}^{-1}$ |
| $c_{\lambda e,s}$    | water use parameter seasonal vegetation                | -3.0 - 0.0       | Long-term | -                                   |
| $M_{A,p}$            | fractional cover perennial vegetation                  | 0 - 1            | Long-term | -                                   |
| $y_{r,p}$            | rooting depth perennial vegetation                     | 1.0 - 9.0        | Long-term | m                                   |
| $y_{r,s}$            | rooting depth seasonal vegetation                      | 0.05 - 2         | Long-term | m                                   |
| $M_{A,s}$            | fractional cover seasonal vegetation                   | 0.00 - (1.0-pct) | Daily     | -                                   |
| $J_{\max 25,p}$      | electron transport capacity perennial vegetation       | -                | Daily     | $\text{mol s}^{-1} \text{m}^{-2}$   |
| $J_{\max 25,s}$      | electron transport capacity annual vegetation          | -                | Daily     | $\text{mol s}^{-1} \text{m}^{-2}$   |
| $G_{s,p}$            | stomatal conductance perennial vegetation              | -                | Daily     | $\text{mol s}^{-1} \text{m}^{-2}$   |
| $G_{s,s}$            | stomatal conductance seasonal vegetation               | -                | Daily     | $\text{mol s}^{-1} \text{m}^{-2}$   |
| $S_{\text{Adr},i,s}$ | root surface area distribution of perennial vegetation | -                | Daily     | $\text{m}^2 \text{m}^{-3}$          |
| $S_{\text{Adr},i,s}$ | root surface area distribution of annual vegetation    | -                | Daily     | $\text{m}^2 \text{m}^{-3}$          |

**Table S8.3.** Soil characteristics of the study sites along the North Australian Tropical Transect, based on data from the Soil and Landscape Grid of Australia [?, ?, ?], in addition to field measurements of J. Beringer and L. B. Hutley. Here,  $\theta_r$  refers to the residual moisture content,  $\theta_s$  the saturated water content,  $\alpha$  and  $n$  the Van Genuchten soil parameters [?] and  $K_{sat}$  the saturated hydraulic conductivity.

| Howard Springs | Soil type       | $\theta_r$ (-) | $\theta_s$ (-) | $\alpha$ (1/m) | $n$ (-) | $K_{sat}$ (m/s)   |
|----------------|-----------------|----------------|----------------|----------------|---------|-------------------|
| 0.00-0.20m     | Sandy Loam      | 0.065          | 0.41           | 7.5            | 1.89    | $1.228 * 10^{-5}$ |
| 0.20-0.40m     | Sandy Loam      | 0.065          | 0.41           | 7.5            | 1.89    | $1.228 * 10^{-5}$ |
| 0.40-0.60m     | Sandy Clay Loam | 0.1            | 0.39           | 5.9            | 1.48    | $3.639 * 10^{-6}$ |
| 0.60-bedrock   | Sandy Clay Loam | 0.1            | 0.39           | 5.9            | 1.48    | $3.639 * 10^{-6}$ |
| Adelaide River |                 |                |                |                |         |                   |
| 0.00-0.20m     | Silt Loam       | 0.067          | 0.45           | 2              | 1.41    | $1.25 * 10^{-6}$  |
| 0.20-0.40m     | Sandy Clay Loam | 0.1            | 0.39           | 5.9            | 1.48    | $3.639 * 10^{-6}$ |
| 0.40-0.60m     | Sandy Clay Loam | 0.1            | 0.39           | 5.9            | 1.48    | $3.639 * 10^{-6}$ |
| 0.60-bedrock   | Sandy Clay Loam | 0.1            | 0.39           | 5.9            | 1.48    | $3.639 * 10^{-6}$ |
| Daly River     |                 |                |                |                |         |                   |
| 0.00-0.20m     | Sandy Loam      | 0.065          | 0.41           | 7.5            | 1.89    | $1.228 * 10^{-5}$ |
| 0.20-0.40m     | Loamy Sand      | 0.057          | 0.41           | 12.4           | 2.28    | $4.053 * 10^{-6}$ |
| 0.40-0.60m     | Sandy Loam      | 0.065          | 0.41           | 7.5            | 1.89    | $1.228 * 10^{-5}$ |
| 0.60-bedrock   | Sandy Clay Loam | 0.1            | 0.39           | 5.9            | 1.48    | $3.639 * 10^{-6}$ |
| Dry River      |                 |                |                |                |         |                   |
| 0.00-0.20m     | Sandy Loam      | 0.065          | 0.41           | 7.5            | 1.89    | $1.228 * 10^{-5}$ |
| 0.20-0.40m     | Sandy Clay Loam | 0.1            | 0.39           | 5.9            | 1.48    | $3.639 * 10^{-6}$ |
| 0.40-0.60m     | Sandy Clay      | 0.1            | 0.38           | 2.7            | 1.23    | $3.333 * 10^{-6}$ |
| 0.60-bedrock   | Sandy Clay      | 0.1            | 0.38           | 2.7            | 1.23    | $3.333 * 10^{-6}$ |
| Sturt Plains   |                 |                |                |                |         |                   |
| 0.00-0.20m     | Silt Loam       | 0.067          | 0.45           | 2              | 1.41    | $1.25 * 10^{-6}$  |
| 0.20-0.40m     | Sandy Clay      | 0.1            | 0.38           | 2.7            | 1.23    | $3.333 * 10^{-6}$ |
| 0.40-0.60m     | Sandy Clay      | 0.1            | 0.38           | 2.7            | 1.23    | $3.333 * 10^{-6}$ |
| 0.60-bedrock   | Sandy Clay      | 0.1            | 0.38           | 2.7            | 1.23    | $3.333 * 10^{-6}$ |
